# Supplementary material for: A Joint SOC Estimation Method Based on FFRLS-AEKF-LSTM
Source: Research Square preprint supplement (doi:10.21203/rs.3.rs-6858550/v1), 2025-07-18
Supplement: Supplementary file 1 [file 4d8eddfb124ef2bbc7b7faa9.docx]

1.Regarding data availability

The dataset generated and/or analyzed during this study cannot be made public due to [belonging to SAIC GM Wuling Company, the experiment was conducted with the support of SAIC GM Wuling Company, but the company's dataset cannot be made public]. However, it can be obtained from the corresponding author upon reasonable request.

But I can provide all the original images in the manuscript.

2.About Fig 1.8

I don't quite understand the meaning of 'not cited in the text'. Figure 8 is a presentation of the experimental results, but I did find that the vertical axis legend in Figure 8 is incorrect and has been changed to SOC (error), which was originally SOC.

3. My manuscript does not have any relevant tables, so I have deleted the relevant paragraphs.

2025.6.16

I'm very sorry for not checking my email over the weekend, which caused the delayed submission. I have now added the explanation regarding Figures 7 and 8 in the manuscript.
